# Supplementary material
Source: PubMed Central journal article supplement (PMC3701240)

### Fig 1C Western blotting

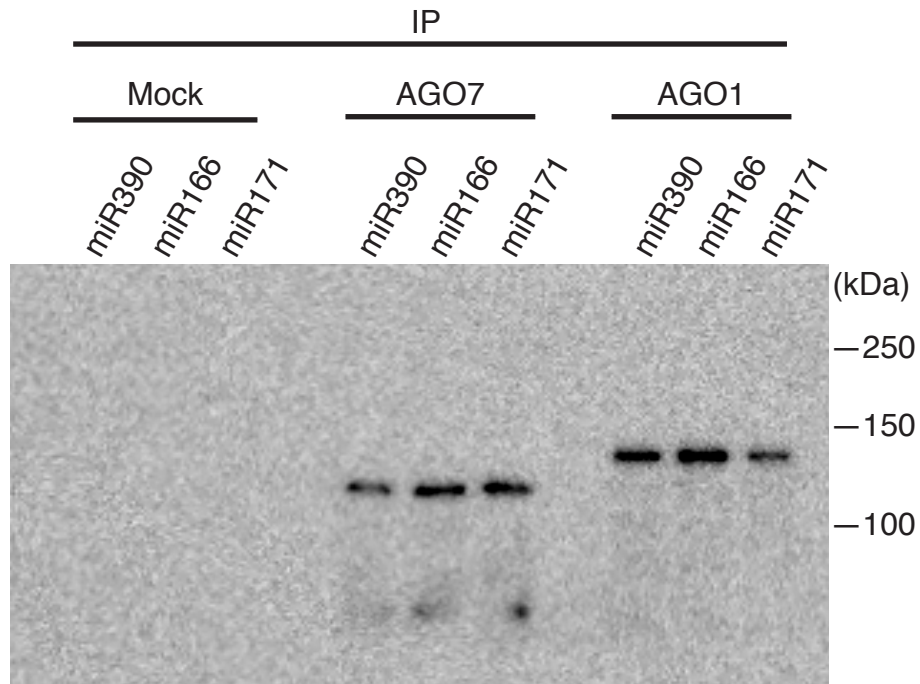

### Fig 1D Western blotting

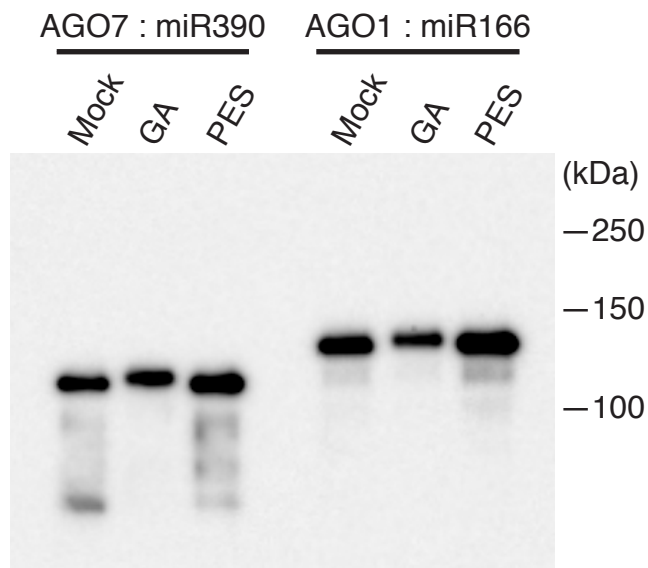

Supplement: embor201373df1.pdf [file embor201373df1.pdf]

## Fig 2B Western blotting

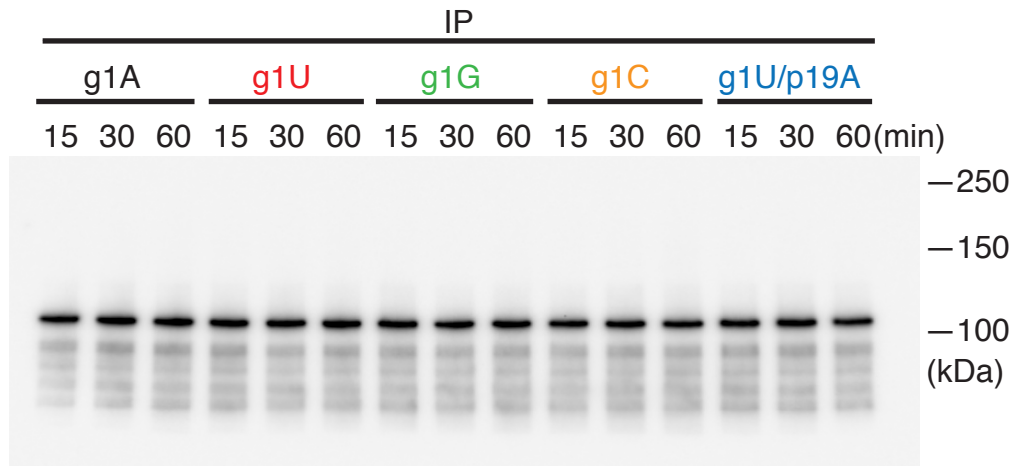

Supplement: embor201373df2.pdf [file embor201373df2.pdf]
